# Supplementary material for: Keratinocytes Derived from Patient-Specific Induced Pluripotent Stem Cells Recapitulate the Genetic Signature of Psoriasis Disease
Source: PubMed Central journal article supplement — Stem Cells Dev. 2020 Apr 2;29(7):383–400. doi: 10.1089/scd.2019.0150 (PMC7153648; doi:10.1089/scd.2019.0150), 2020-04-02
Supplement: Supp_Data.pdf [file Supp_Data.pdf]

## **Supplementary Materials**

### **Supplementary Materials and Methods**

#### **Generation of 3D Skin Equivalent**

3D skin equivalents were generated on polycarbonate culture inserts (Nunc) according to the previously described protocol [1]. Briefly, neutralized type I collagen (Sigma) containing human dermal fibroblast (Thermo Fisher Scientific, Cat# C0135C) were poured on the insert and incubated at 37 °C for 2 hrs to polymerize. The dermal equivalent was incubated with the fibroblast medium for 5 days. Then,  $1 \times 10^6$  KCs derived from Ctr-iPSCs and PsO-iPSCs at day 20 of differentiation were seeded on the dermal equivalent. The cells were grown in 1:1 of N2 medium and DMEM containing 10% FBS, 1% NEAA, 1% L-Glutamine for 10 days in the submerged condition, following which the cells were exposed to the air and fed from below for 5 days in medium containing 1.3mM  $\text{CaCl}_2$ .

### **Supplementary Results and Discussion**

The PSORS1 locus maps to the Major Histocompatibility Complex (MHC) on chromosome 6p21 and is conclusively validated the major genetic determinant of psoriasis [2]. These investigations defined a consensus 150 kb minimal interval spanning the MHC class I region and encompassing nine genes [2,3]. We found HLA-C localized in this region was overexpressed in our psoriasis iPSCs derived keratinocytes. HLA-C encodes a MHC class I receptor that participates to immune responses through the presentation of antigens to CD8<sup>+</sup> T lymphocytes. It is therefore a very plausible candidate gene, especially as serological studies carried out as early as the mid-1970s had identified an association between psoriasis and the HLA-C [4]. Given its very prominent position in the genetic landscape of psoriasis, the MHC

region has been the subject of very detailed genetic studies, carried out in European and Asian populations. These have identified many additional association signals that are independent of HLA-C and map to HLA-A, HLA-B and HLA-DQA1 [5,6]. In our RNA-seq results, HLA-DQA1 and DQB1 were down-regulated in both psoriasis iPSCs derived keratinocytes, while HLA-A was up-regulated in 1PSO and down-regulated in 2PSO.

It is generally accepted that T helper cells including Th1, Th17 and Th22 cells contribute to the development of psoriasis by secreting various cytokines [7,8], which results in the excessive proliferation and aberrant differentiation of keratinocytes. However, recent studies show that keratinocyte produces various kinds of cytokines leading to an amplified immune response [8-10] and thus directly or indirectly causes the major histological features of psoriasis. In our RNA-seq results, we found a number of cytokines deregulated in psoriasis iPSCs derived keratinocytes which consequently result in altered expression of downstream genes. In the RNA-seq data analysis, we found members of interferon-inducible protein with tetratricopeptide repeats (IFITs) family, member of interferon induced transmembrane (IFITM) protein family and members of PYHIN (IFI200/HIN-200) family were upregulated in KCs derived from PsO-iPSCs (Table S4).

## Supplementary Figures and Tables

**Figure S1**

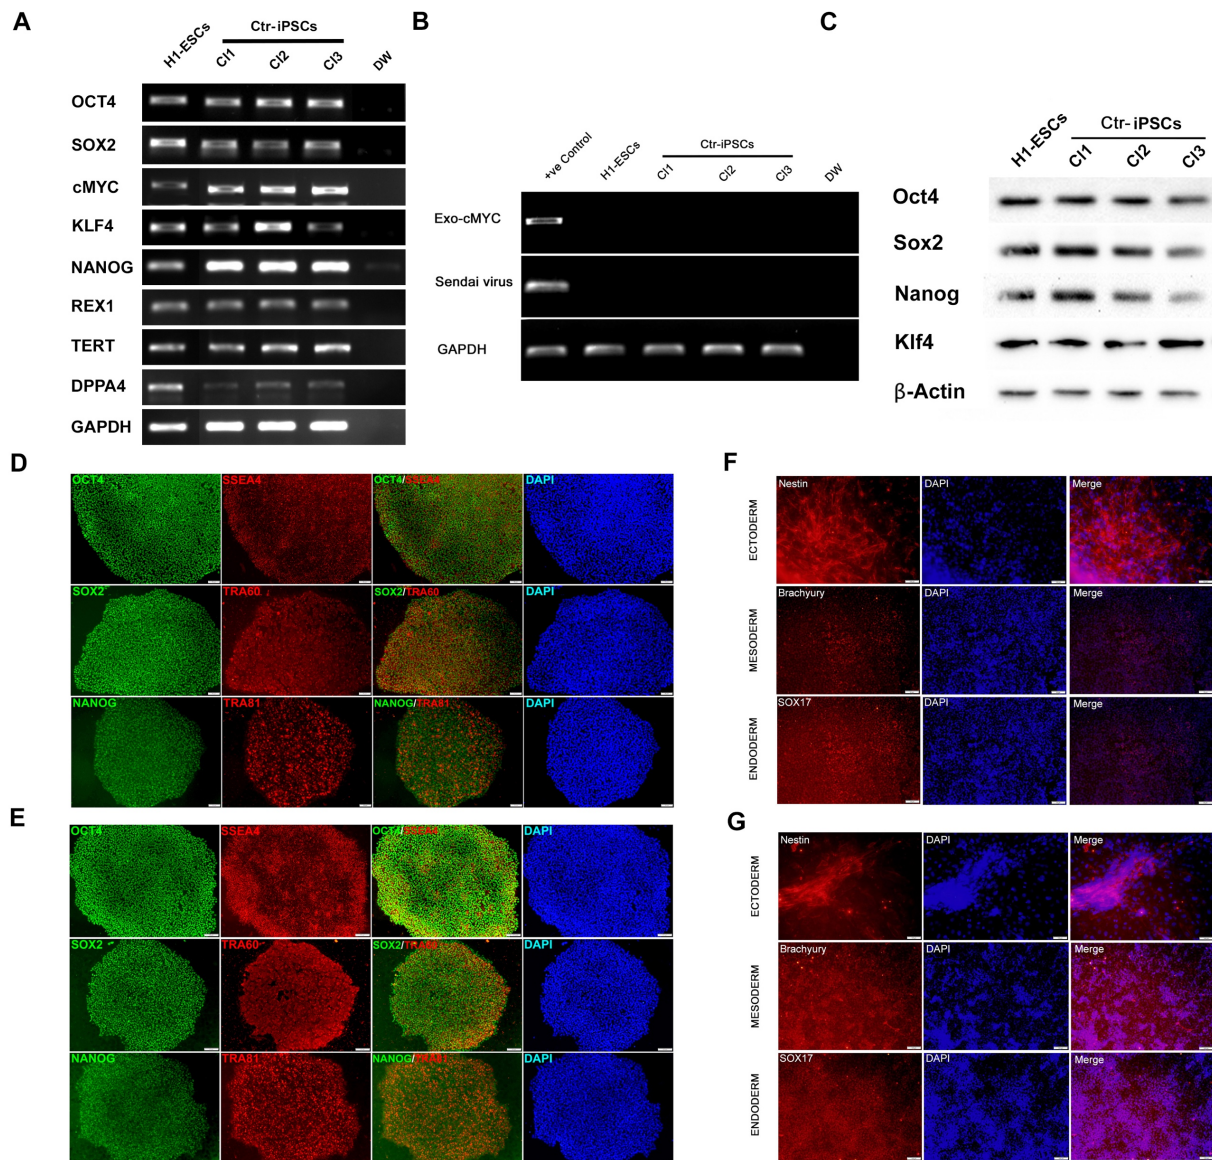

**Figure S1: Characterization of the generated iPSC clones from a healthy individual (Ctr1-iPSCs).** (A) The three iPSC clones expressed the endogenous pluripotency markers (OCT4, SOX2, CMYC, KLF4, NANOG, REX1, TERT, and DPPA4) by RT-PCR. (B) RT-PCR showing the loss of the exogenous pluripotency factor, c-MYC and the backbone of the Sendai virus used for the transduction. (C) Western blotting showing expression of the self-renewal markers (OCT4, SOX2, NANOG, KLF4). (D) Immunofluorescence images showing the expression of pluripotency markers in Ctr1-iPSC clone 1 (D) and Ctr-iPSCs clone 2 (E). Representative images of the spontaneously differentiated EBs showing the expression of NESTIN (ectoderm), BRACHYURY (mesoderm) and SOX17 (endoderm) in Ctr1-iPSCs clone 1 (F) and Ctr1-iPSCs clone 2 (G). DW, distal water.

**Figure S1**

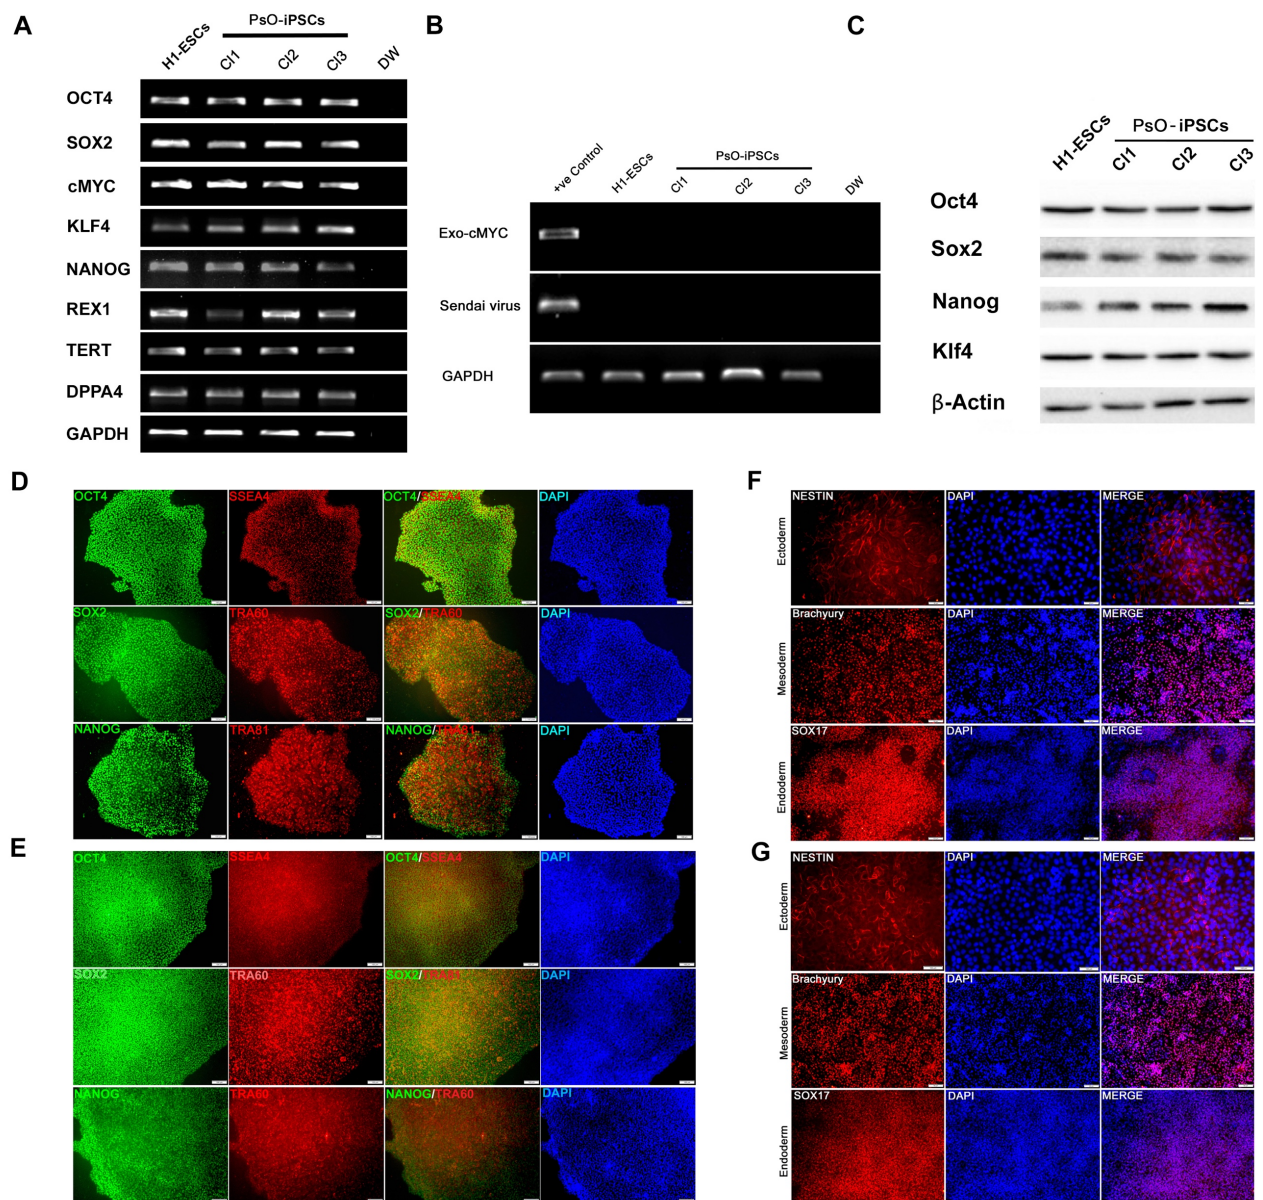

**Figure S2: Characterization of the generated iPSCs from a psoriatic patient (PsO2-iPSCs).** (A) RT-PCR analysis of iPSC clones generated from a psoriatic patient (PsO2-iPSCs) showing the expression of the endogenous pluripotency markers (OCT4, SOX2, C-MYC, KLF4, NANOG, REX1, TERT, and DPPA4) (A) and the loss of the exogenous expression of pluripotency factor, c-MYC and the backbone of the Sendai virus itself (B). The protein expression of pluripotency markers, including OCT4, SOX2, NANOG, KLF4, SSEA4, TRA81, and TRA60 were confirmed using Western blotting (C) and immunostaining (D & E). Representative images of the spontaneously differentiated EBs showing the expression of NESTIN (ectoderm), BRACHYURY (mesoderm) and SOX17 (endoderm) in clone 1 (F) and clone 2 (G). DW, distal water.

**Figure S3**

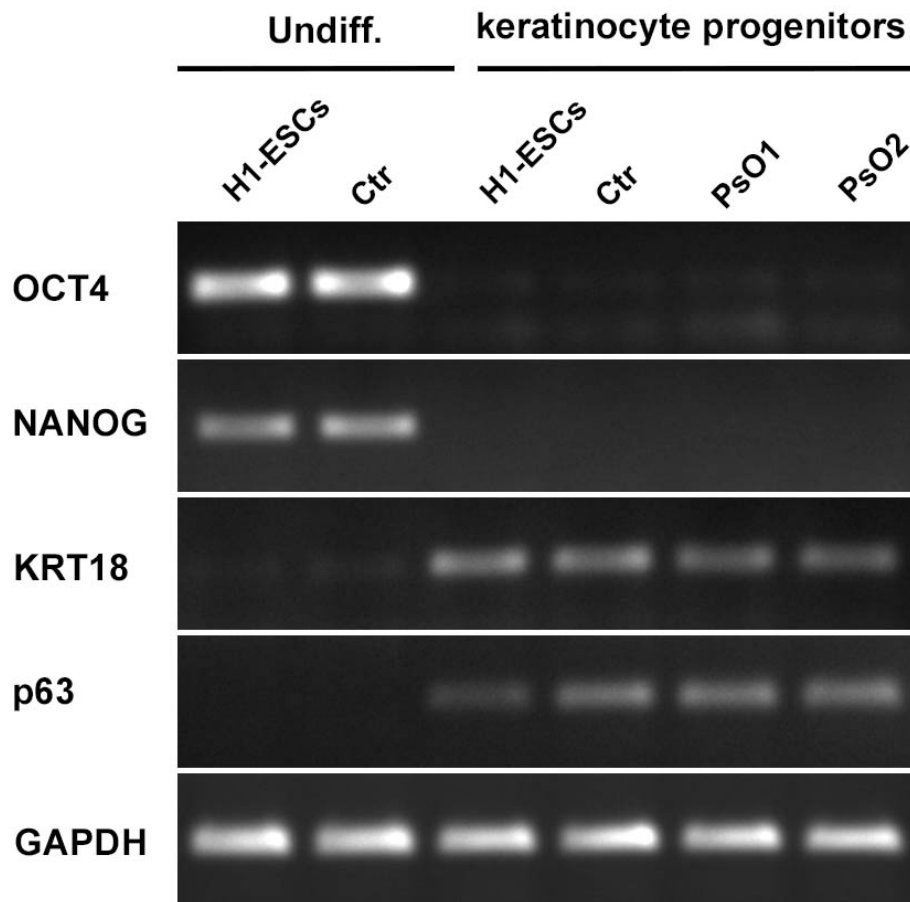

**Figure S3: RT-PCR for keratinocytes progenitors at day 14 of differentiation.** RT-PCR for keratinocytes progenitor's markers (KRT18 and p63) and pluripotency markers (OCT4 and NANOG) at day 14 of differentiation. The PCR products were analyzed on 1% agarose gel. The differentiation showed marked increase in the keratinocyte progenitors' markers (KRT 18 and p63) and loss of the pluripotency markers (OCT4 and NANOG) at day 14 of differentiation both in control and psoriatic. The expression was compared with H1-ESCs and ctrl- iPSCs undifferentiated cells.

**Figure S4**

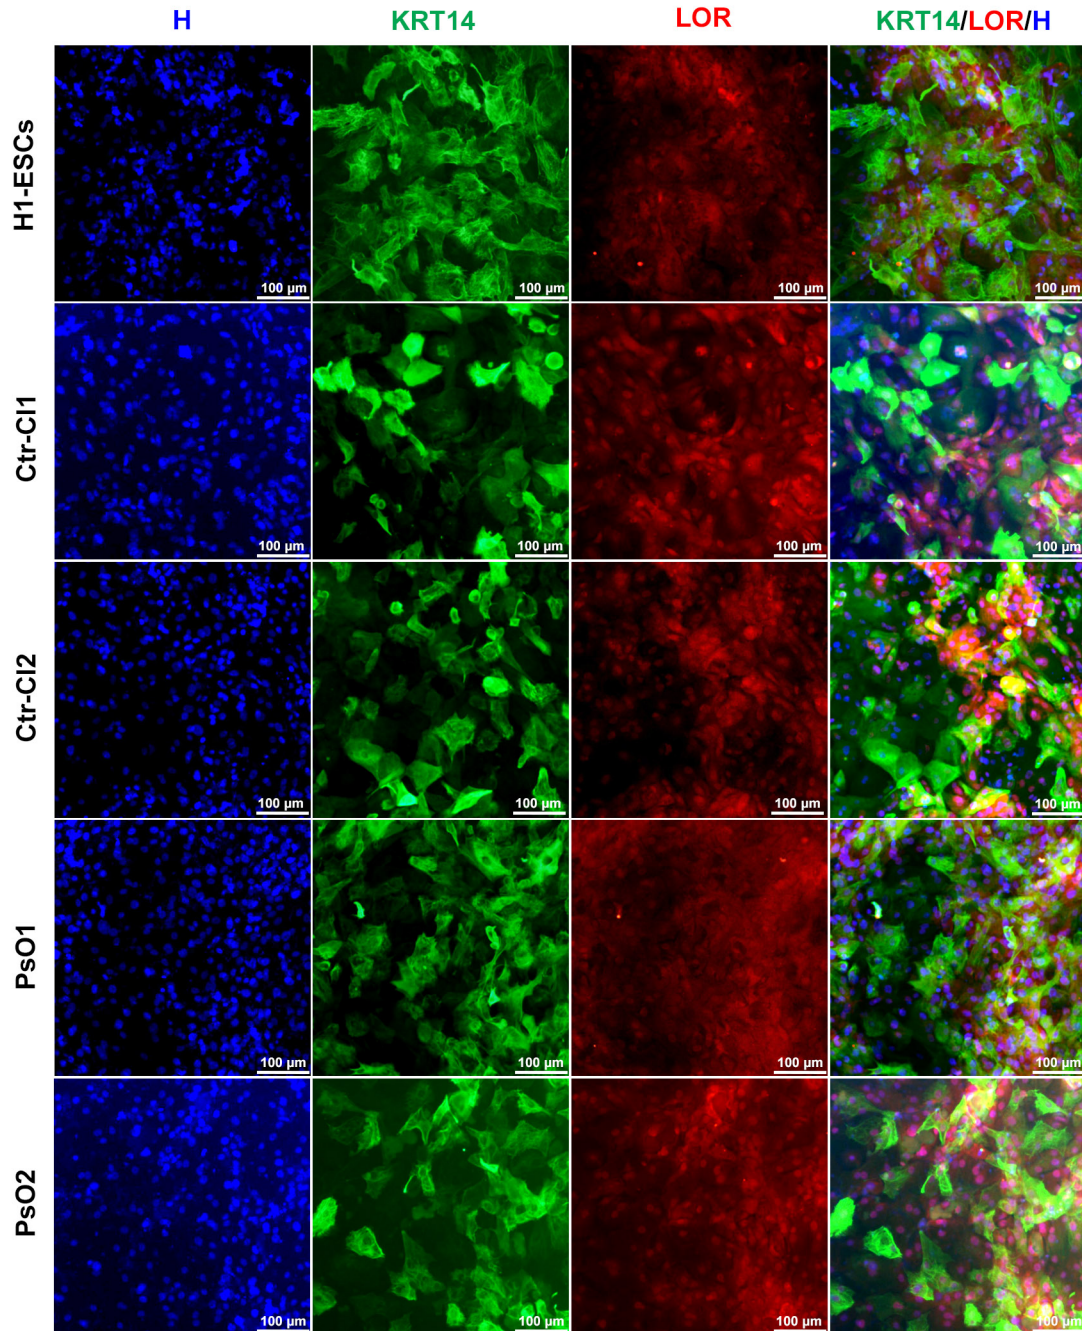

**Figure S4: Immunostaining of the mature iPSC-derived keratinocytes (KCs) at day 30 of differentiation.** The KCs differentiated from Ctr-iPSCs and PsO-iPSCs expressed KRT14 and Loricrin (LOR) proteins, markers of mature KCs. Scale bar = 100  $\mu$ m.

Figure S5

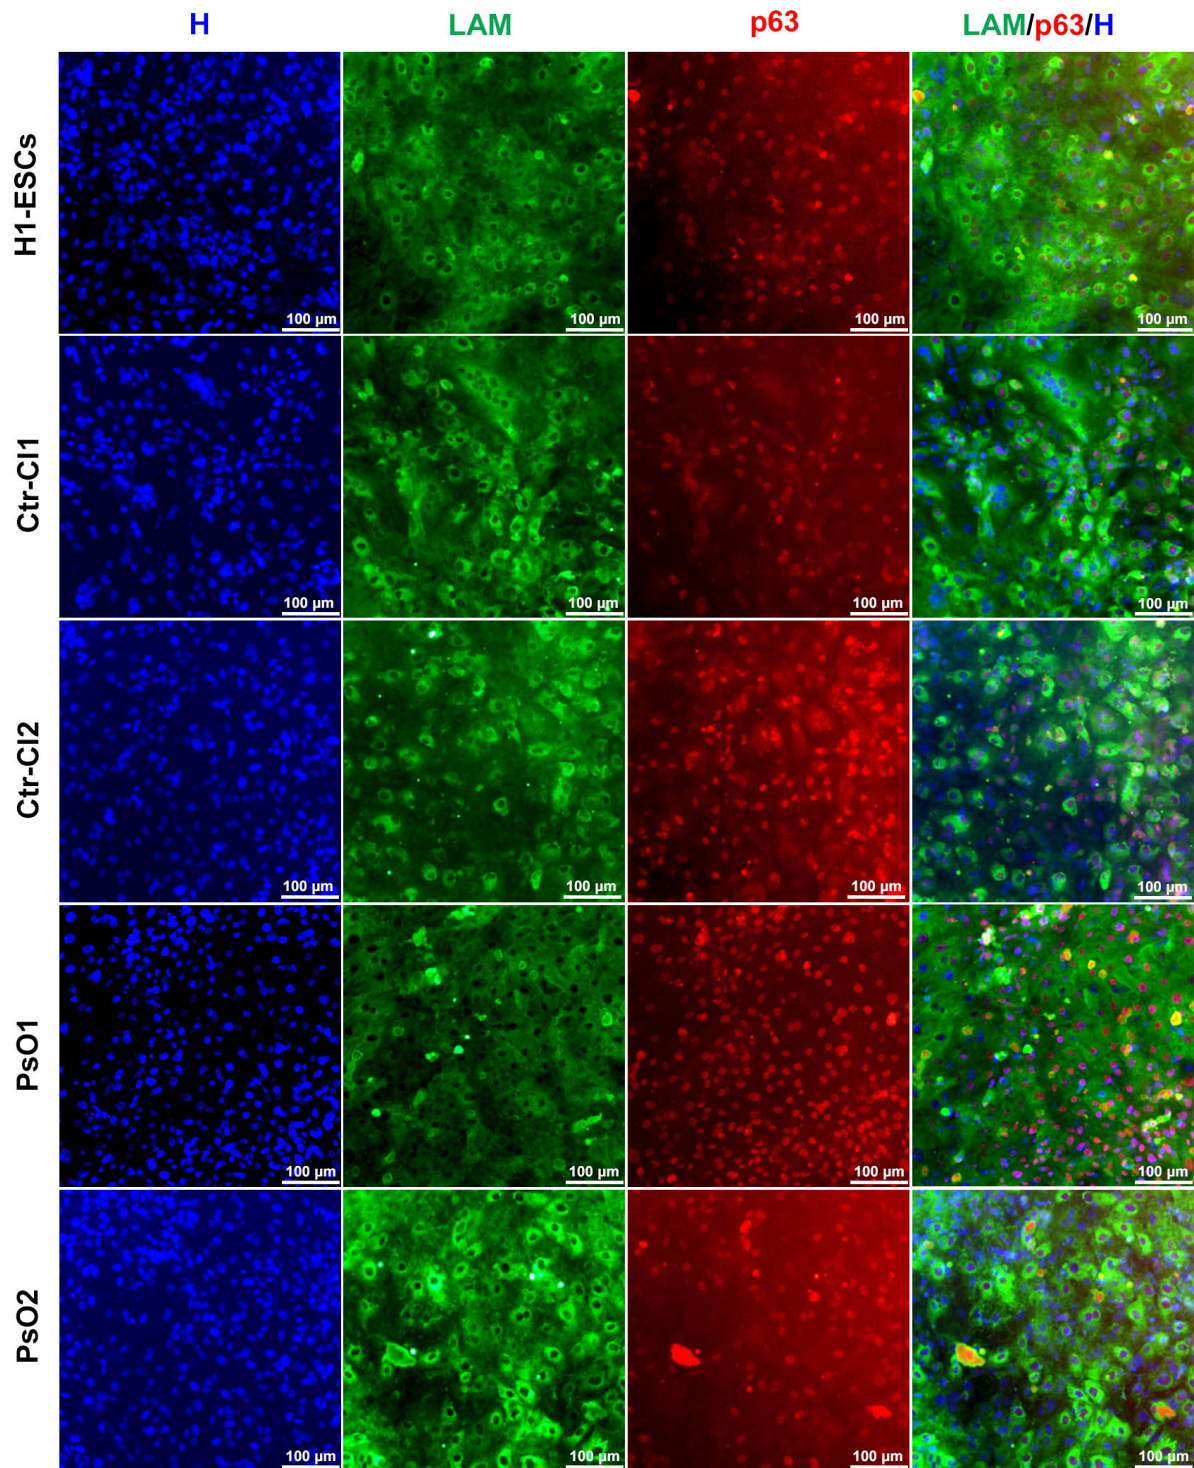

**Figure S5: Immunostaining of the mature iPSC-derived keratinocytes (KCs) at day 30 of differentiation.** The KCs differentiated from Ctr-iPSCs and PsO-iPSCs expressed nuclear p63 and cytosolic Laminin (LAM), markers of mature KCs. Scale bar = 100 μm.

Figure S6

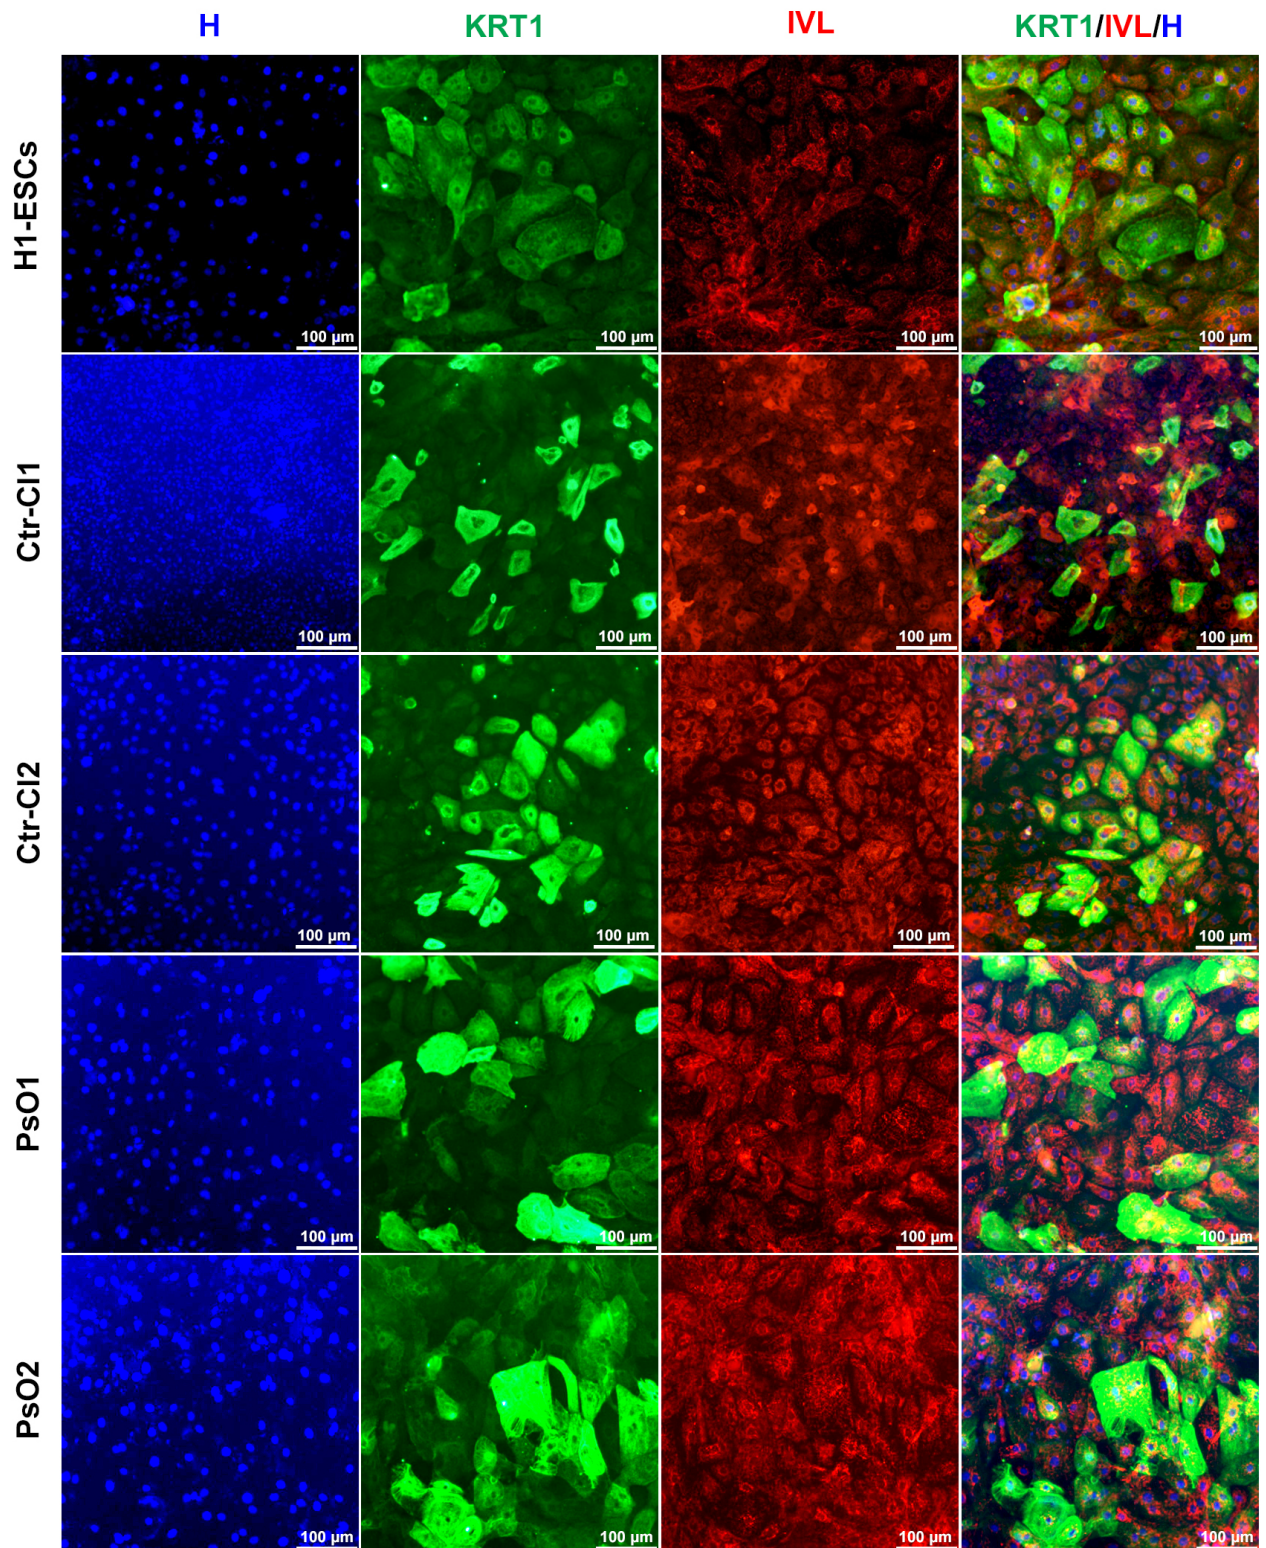

**Figure S6: Immunostaining of the mature iPSC-derived keratinocytes (KCs) at day 30 of differentiation.** The KCs differentiated from Ctr-iPSCs and PsO-iPSCs expressed KRT1 and Involucrin (IVL), markers of mature KCs. Scale bar = 100 μm.



**Figure S7**

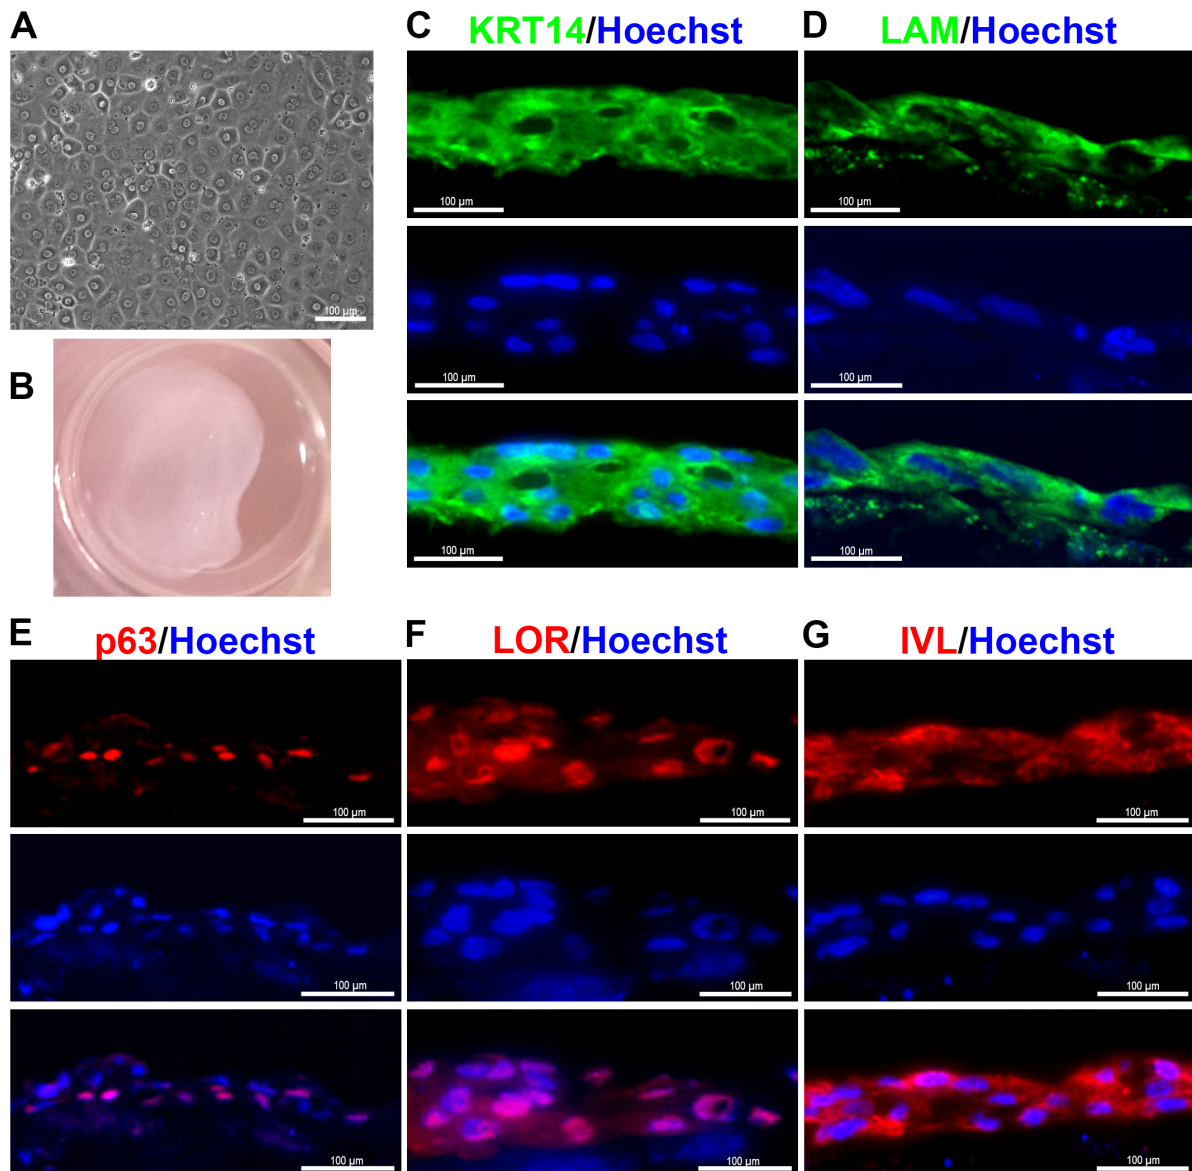

**Table S1.** The details of the antibodies used for immunostaining and Western blotting

| <b>For immunostaining</b>                       |                                           |                  |                 |
|-------------------------------------------------|-------------------------------------------|------------------|-----------------|
| <b>Antibody</b>                                 | <b>Company</b>                            | <b>Catalog #</b> | <b>Dilution</b> |
| Rabbit anti-OCT4                                | CST                                       | 9656S            | 1:500           |
| Rabbit anti-SOX2                                | CST                                       | 9656S            | 1:500           |
| Rabbit anti-NANOG                               | CST                                       | 9656S            | 1:500           |
| Mouse anti-SSEA4                                | CST                                       | 9656S            | 1:500           |
| Mouse anti-TRA60                                | CST                                       | 9656S            | 1:500           |
| Mouse anti-TRA81                                | CST                                       | 9656S            | 1:500           |
| Mouse anti-NESTIN                               | R&D                                       | MAB1259          | 1:500           |
| Mouse anti-SOX17                                | OriGene Technologies                      | CF500096         | 1:2000          |
| Mouse anti-Brachyury                            | Abcam                                     | ab140661         | 1:1000          |
| Rabbit anti-Laminin                             | Abcam                                     | ab14509          | 1:500           |
| Rabbit anti-Loricin                             | Abcam                                     | ab85679          | 1:500           |
| Mouse anti-p63                                  | Abcam                                     | ab735            | 1:500           |
| Rabbit anti-Involucrin                          | Abcam                                     | ab53112          | 1:500           |
| Rabbit anti-cytokeratin 18                      | Abcam                                     | ab181597         | 1:500           |
| Mouse anti-cytokeratin 1                        | Abcam                                     | ab81623          | 1:500           |
| Mouse anti-cytokeratin 14                       | ThermoFisher Scientific                   | MAS-11599        | 1:500           |
| Alexa Fluor 488 anti-rabbit IgG                 | ThermoFisher Scientific                   | A-21206          | 1:500           |
| Alexa Fluor 488 anti-mouse IgG                  | ThermoFisher Scientific                   | A-21202          | 1:500           |
| Alexa Fluor 568 anti-rabbit IgG                 | ThermoFisher Scientific                   | A-10042          | 1:500           |
| Alexa Fluor 568 anti-mouse IgG                  | ThermoFisher Scientific                   | A-10037          | 1:500           |
| <b>For Western blotting</b>                     |                                           |                  |                 |
| Rabbit anti-OCT4                                | CST                                       | 9656S            | 1:5000          |
| Rabbit anti-SOX2                                | CST                                       | 9656S            | 1:5000          |
| Rabbit anti-NANOG                               | CST                                       | 9656S            | 1:5000          |
| Rabbit anti-KLF4                                | Abcam                                     | ab215036         | 1:1000          |
| Mouse anti-cytokeratin 1                        | Abcam                                     | ab81623          | 1:1000          |
| Mouse anti- Cytokeratin 14                      | ThermoFisher Scientific                   | MAS-11599        | 1:1000          |
| Mouse anti-Cytokeratin 19                       | EMD Millipore                             | CBL198           | 1:1000          |
| Rabbit anti-E-Cadherin                          | CST                                       | 3195S            | 1:1000          |
| Rabbit anti-Filaggrin                           | Abcam                                     | ab81468          | 1:1000          |
| Mouse anti-HLA-C                                | EMD Millipore                             | MABF233          | 1:1000          |
| Mouse anti- beta-ACTIN                          | Santa Cruz<br>Biotechnology               | sc-47778         | 1:10000         |
| Peroxidase AffiniPure Donkey<br>Anti-Mouse IgG  | Jackson<br>ImmunoResearch<br>Laboratories | 715-035-150      | 1:10000         |
| Peroxidase AffiniPure Donkey<br>Anti-Rabbit IgG | Jackson<br>ImmunoResearch<br>Laboratories | 711-035-152      | 1:10000         |

**Table S2:** The list of primers for RT-PCR and qPCR used in this study

| Gene name | Forward                            | Reverse                             | Product size |
|-----------|------------------------------------|-------------------------------------|--------------|
| OCT4      | GACAGGGGGAGGGGAGGAGCT<br>AGG       | CTCCCTCCAACCAGTTGCCCA<br>AAC        | 119          |
| SOX2      | GGGAAATGGGAGGGGTGCAAA<br>AGAGG     | TTGCGTGAGTGTGGATGGGATTG<br>GTG      | 126          |
| c-MYC     | GCGTCCTGGGAAGGGAGATCCG<br>GAGC     | TTGAGGGGCATCGTCGCGGGAG<br>GCTG      | 328          |
| KLF4      | CCCAATTACCCATCCTTCCT               | ACGATCGTCTTCCCCTCTTT                | 108          |
| NANOG     | CATGAGTGTGGATCCAGCTTG              | CCTGAATAAGCAGATCCATGG               | 192          |
| REX1      | TCACAGTCCAGCAGGTGTTTG              | TCTGTCTTTGCCCGTTTCT                 | 205          |
| TERT      | CCTGCTCAAGCTGACTCGACAC<br>CGTG     | GGAAAAGCTGGCCCTGGGGTGG<br>AGC       | 446          |
| DPPA4     | GGAGCCGCCTGCCCTGGAAAAT<br>TC       | TTTTCTGATATTCTATTCCCAT              | 384          |
| EXO-cMYC  | TAAGTACTAGCAGG CTTGTCG             | TCC ACA TAC AGT CCT GGA<br>TGATGATG | 532          |
| Sendai-V  | GGATCACTAGGTGATATCGAGC             | ACCAGACAAGAGTTTAAGAGA<br>TATGTATC   | 181          |
| MAP2      | CAGGTGGCGGACGTGTGAAAAT<br>TGAGAGTG | CACGCTGGATCTGCCTGGGGACT<br>GTG      | 187          |
| PAX6      | CGAATTCTGCAGGTGTCCAA               | ACAGACCCCCTCGGACAGTAAT              | 207          |
| T         | GCCCTCTCCCTCCCCTCCACGCA<br>CAG     | CGGCGCCGTTGCTCACAGACCA<br>CAGG      | 258          |
| GATA6     | AAGCGCGTGCCTTCATCA                 | TCATAGCAAGTGGTCTGGGC                | 157          |
| SOX17     | TCCTGGAGGAGCTAAGGAAA               | GCCACTTCCAAGGTGTAAG                 | 773          |
| GAPDH     | ACGACCACTTTGTCAAGCTCAT<br>TTC      | GCAGTGAGGGTCTCTCTTCTCCT<br>CT       | 132          |
| KRT18     | GTACTGGTCTCAGCAGATTG               | CTGGCCTTCAGATTTCTCAT                | 150          |
| P63       | TTCGGACAGTACAAAGAAC                | CCCTCACTGGTAAGTATAAC                | 128          |
| IRS2      | ACTTCTTGTCACCACCTTG                | TGACATCCTGGTGATAAAGCC               | 78           |
| PSORS1C1  | GATGGCATCTAGAAGTAGAC               | GATGGTTTCTGTTGCATTT                 | 138          |
| TNFAIP2   | CAATGTGAGGGAGTTGATG                | GAGGTGATCTGGATGATGT                 | 129          |
| Filaggrin | GGTCACTTTAGTAGTCTTTC               | CATAATCTGCACTACCATAG                | 169          |
| SLC39A4   | GTCAGAGAGGTATCTGTACG               | GAAGGTCTGCAGGATGTAG                 | 124          |
| HLA-C     | TGATGTGTAGGAGGAAGAG                | GTCTCAGGCTTACAAGTG                  | 113          |
| BST2      | CAATGTCACCCATCTCCTG                | TGTAGTGATCTCTCCCTCAA                | 175          |
| OAS1      | GGATTCTGCTGGCTGAAAG                | GCTGGGTCTATGAGAGAAATG               | 116          |
| OAS3      | CTTCAATGTCCTGGGTGAG                | GCTTCAACCAGCAAGATTAG                | 176          |
| IFI44     | TGATAGATACCAGTTTAATCCC             | CATCTGAGAGGAGAAGTATTG               | 142          |

|           |                      |                        |     |
|-----------|----------------------|------------------------|-----|
| IFI44L    | TCGAGTTGAAGGAATTAAGG | TGAAACCAAGTCTGCATAG    | 121 |
| IFIT3     | CATGAGTGAGGTCACCAAGA | GTAGGCCAACAAGTTGTACATT | 178 |
| IFITM1    | GTCCACCGTGATCAACATC  | CTTCCTGTCCCTAGACTTCA   | 139 |
| IFITM3    | CTACTCCGTGAAGTCTAGG  | GATGACGATGAGCAGAATG    | 136 |
| PARP12    | GGGAAGAAGTGTAGGAATAG | TAATGTTGGCAAATTTCTGG   | 152 |
| PARP14    | GAAATCCAAAGTTGACATCC | ATCCTCTCAATCTTCTCTATTC | 156 |
| KRTAP19-1 | CTTTGGAAGCTACGGATATG | CTCCTCTGCTTCCAATTC     | 156 |

**Table S3:** The deep coverage of the sequencing experiments per sample

| <b>Sample</b>    | <b>Number of input reads</b> | <b>Number of uniquely mapped reads (%)</b> | <b>Number of multi-mapped reads (%)</b> |
|------------------|------------------------------|--------------------------------------------|-----------------------------------------|
| Ctr -replicate1  | 28,011,217                   | 26,129,902 (93.3%)                         | 1,195,359 (4.3%)                        |
| Ctr – replicate2 | 30,405,493                   | 28,307,585 (93.1%)                         | 1,347,399 (4.4%)                        |
| PsO1-replicate1  | 19,836,988                   | 18,412,476 (92.8%)                         | 954,769 (4.8%)                          |
| PsO1-replicate2  | 19,500,016                   | 17,976,811 (92.2%)                         | 1,047,795 (5.4%)                        |
| PsO2-replicate1  | 45,138,646                   | 41,293,365 (91.5%)                         | 2,112,214 (4.7%)                        |
| PsO2-replicate2  | 32,665,903                   | 30,029,437 (91.9%)                         | 1,434,537 (4.4%)                        |

**Table S4.** Chromosomal location of some of type I interferon (IFN)-inducible genes significantly upregulated in KCs generated from PsO-iPSCs in comparison to those generated from Ctr-iPSCs.

| <b>Gene name</b> | <b>Chromosome location</b>   | <b>log<sub>2</sub>(FC) in KCs-<br/>PsO1</b> | <b>log<sub>2</sub> (FC) in KCs-<br/>PsO2</b> |
|------------------|------------------------------|---------------------------------------------|----------------------------------------------|
| IFIT1            | chr10:89392545-<br>89406487  | 6.81603                                     | 2.02651                                      |
| IFIT2            | chr10:89301948-<br>89309276  | 5.92189                                     | 2.32401                                      |
| IFIT3            | chr10:89327818-<br>89340968  | 6.73403                                     | 3.38887                                      |
| IFIT5            | chr10:89414567-<br>89421002  | 2.69751                                     | 1.4171                                       |
| IFITM1           | chr11:313990-315272          | 6.81603                                     | 3.94693                                      |
| IFITM2           | chr11:308106-309410          | 4.45095                                     | 2.66693                                      |
| IFITM3           | chr11:319672-320914          | 4.41602                                     | 3.46056                                      |
| IFI6             | chr1:27666060-27672213       | 4.72468                                     | 1.73349                                      |
| IFI16            | chr1:159009891-<br>159055155 | 2.19279                                     | 1.08832                                      |
| IFI44            | chr1:78649788-78664078       | 5.85548                                     | 2.66848                                      |
| IFI44L           | chr1:78620381-78646145       | 5.6387                                      | 2.92383                                      |

## Supplementary References

1. Itoh M, M Kiuru, MS Cairo and AM Christiano. (2011). Generation of keratinocytes from normal and recessive dystrophic epidermolysis bullosa-induced pluripotent stem cells. *Proc Natl Acad Sci U S A* 108:8797-802.
2. Balendran N, RL Clough, JR Arguello, R Barber, C Veal, AB Jones, JL Rosbotham, AM Little, A Madrigal, JN Barker, SH Powis and RC Trembath. (1999). Characterization of the major susceptibility region for psoriasis at chromosome 6p21.3. *J Invest Dermatol* 113:322-8.
3. Nair RP, PE Stuart, I Nistor, R Hiremagalore, NVC Chia, S Jenisch, M Weichenthal, GR Abecasis, HW Lim, E Christophers, JJ Voorhees and JT Elder. (2006). Sequence and haplotype analysis supports HLA-C as the psoriasis susceptibility 1 gene. *Am J Hum Genet* 78:827-851.
4. Mallon E, R Newson and CB Bunker. (1999). HLA-Cw6 and the genetic predisposition to psoriasis: a meta-analysis of published serologic studies. *J Invest Dermatol* 113:693-5.
5. Knight J, SL Spain, F Capon, A Hayday, FO Nestle, A Clop, C Wellcome Trust Case Control, C Genetic Analysis of Psoriasis, IcfP Consortium, JN Barker, ME Weale and RC Trembath. (2012). Conditional analysis identifies three novel major histocompatibility complex loci associated with psoriasis. *Hum Mol Genet* 21:5185-92.
6. Okada Y, B Han, LC Tsoi, PE Stuart, E Ellinghaus, T Tejasvi, V Chandran, F Pellett, R Pollock, AM Bowcock, GG Krueger, M Weichenthal, JJ Voorhees, P Rahman, PK Gregersen, A Franke, RP Nair, GR Abecasis, DD Gladman, JT Elder, PI de Bakker and S Raychaudhuri. (2014). Fine mapping major histocompatibility complex associations in psoriasis and its clinical subtypes. *Am J Hum Genet* 95:162-72.
7. Perera GK, P Di Meglio and FO Nestle. (2012). Psoriasis. *Annu Rev Pathol* 7:385-422.
8. Lowes MA, AM Bowcock and JG Krueger. (2007). Pathogenesis and therapy of psoriasis. *Nature* 445:866-73.
9. Homey B, MC Dieu-Nosjean, A Wiesenborn, C Massacrier, JJ Pin, E Oldham, D Catron, ME Buchanan, A Muller, R deWaal Malefyt, G Deng, R Orozco, T Ruzicka, P Lehmann, S Lebecque, C Caux and A Zlotnik. (2000). Up-regulation of macrophage inflammatory protein-3 alpha/CCL20 and CC chemokine receptor 6 in psoriasis. *J Immunol* 164:6621-32.
10. Laggner U, P Di Meglio, GK Perera, C Hundhausen, KE Lacy, N Ali, CH Smith, AC Hayday, BJ Nickoloff and FO Nestle. (2011). Identification of a novel proinflammatory human skin-homing Vgamma9Vdelta2 T cell subset with a potential role in psoriasis. *J Immunol* 187:2783-93.
